# Supplementary material for: Influence of Na+ion doping on the phase change and upconversion emissions of the GdF3: Yb3+, Tm3+nanocrystals obtained from the designed molecular precursors
Source: Royal Society of Chemistry journal article supplement (doi:10.1039/c5ra20781a), 2015-01-01
Supplement: c5ra20781a1.pdf [file c5ra20781a1.pdf]

## Supporting information

### **Influence of Na<sup>+</sup> ion doping on the phase change and upconversion emissions of the GdF<sub>3</sub>: Yb<sup>3+</sup>, Tm<sup>3+</sup> nanocrystals obtained from the designed molecular precursors**

**Hana Ayadi,<sup>a</sup> Wenzhang Fang,<sup>a,b</sup> Shashank Mishra,<sup>\*a</sup> Erwann Jeanneau,<sup>c</sup> Gilles  
Ledoux,<sup>d</sup> Jinlong Zhang<sup>b</sup> and Stéphane Daniele<sup>a</sup>**

<sup>a</sup> Université Lyon 1, CNRS, UMR 5256, IRCELYON, Institut de recherches sur la catalyse et l'environnement de Lyon, 2 avenue Albert Einstein, F-69626 Villeurbanne, France

<sup>b</sup> Key Laboratory for Advanced Materials and Institute of Fine Chemicals, East China University of Science and Technology, 130 Meilong Road, Shanghai 200237, China

<sup>c</sup> University of Lyon1, Centre de Diffractométrie Henri Longchambon, 5 rue de La Doua, 69100 Villeurbanne, France

<sup>d</sup> University of Lyon1, Institut Lumière Matière, UMR5306 CNRS, Bâtiment Kastler, 10 rue Ada Byron, 69622 Villeurbanne, France

E-mail: [shashank.mishra@ircelyon.univ-lyon1.fr](mailto:shashank.mishra@ircelyon.univ-lyon1.fr); Fax: 33-472445399; Tel: 33 472445322.

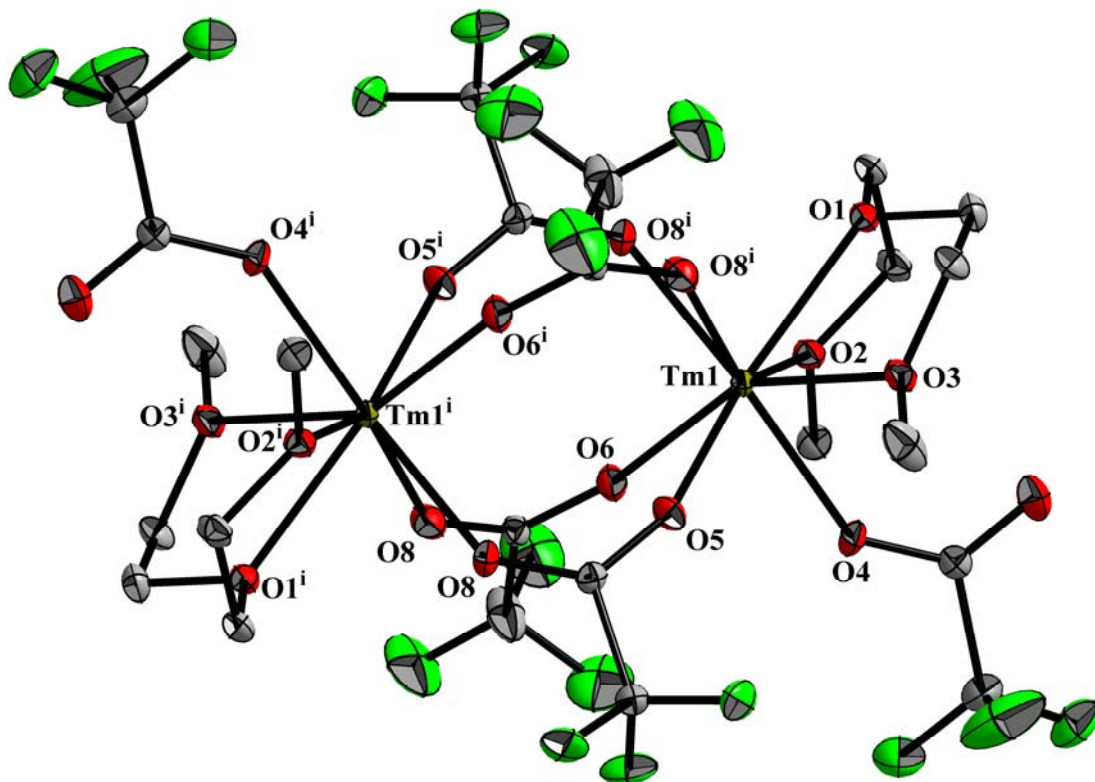

**Fig. S1** Perspective view of  $[\text{Tm}_2(\text{TFA})_6(\text{diglyme})_2]$  (**2**). H-atoms on diglyme ligand have been omitted for clarity. Selected bond lengths ( $\text{\AA}$ ) and angles ( $^\circ$ ): Tm1—O9 2.434 (5), Tm1—O27<sup>i</sup> 2.315 (5), Tm1—O11 2.267 (4), Tm1—O13<sup>i</sup> 2.310 (5), Tm1—O18 2.236 (4), Tm1—O2 2.383 (4), Tm1—O25 2.260 (5), Tm1—O5 2.439 (5), O27<sup>i</sup>—Tm1—O13<sup>i</sup> 72.42 (18), O2—Tm1—O18 106.92 (16), O2—Tm1—O5 67.24 (15), O5—Tm1—O18 76.11 (17), O2—Tm1—O9 66.05 (16), O9—Tm1—O18 74.04 (17), O5—Tm1—O9 112.43 (16), O2—Tm1—O18 106.92 (16), O2—Tm1—O11 144.56 (17), O2—Tm1—O25 138.44 (17), O5—Tm1—O11 144.74 (16), O5—Tm1—O25 76.50 (16), O9—Tm1—O11 82.62 (17), O9—Tm1—O25 151.28 (17), O11—Tm1—O25 76.59 (18), O11—Tm1—O18 78.12 (17). Symmetry code: (i)  $-x, -y+1, -z+1$

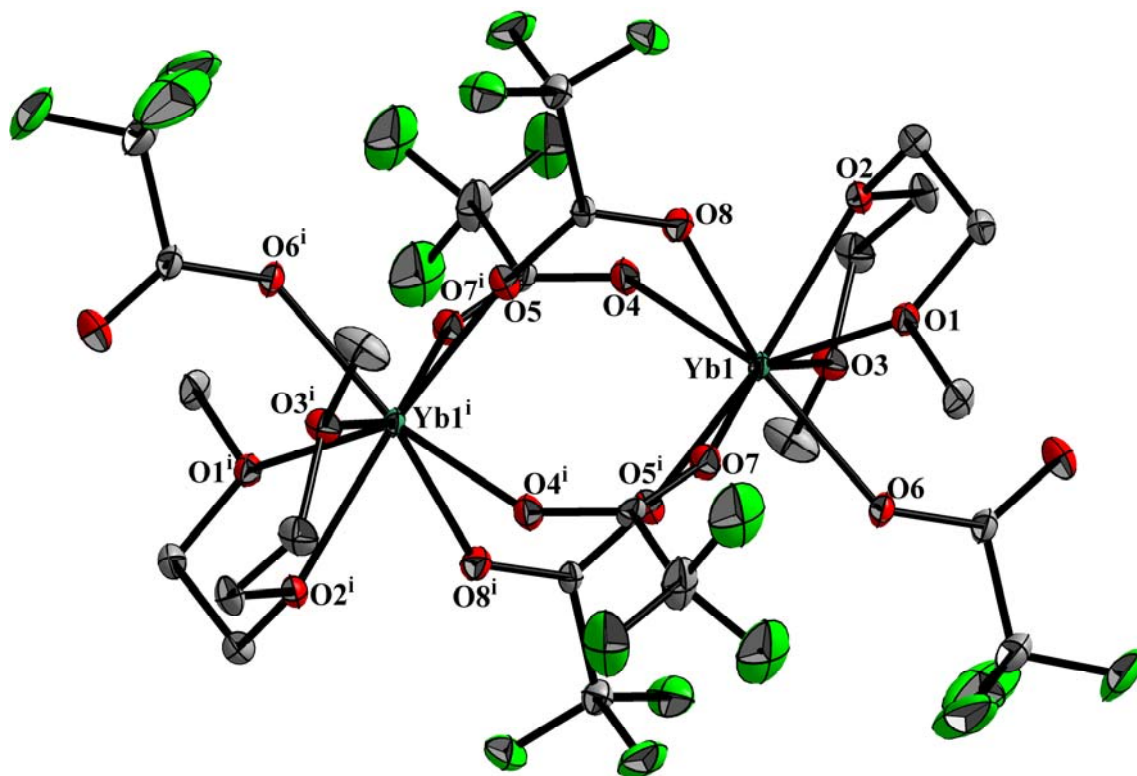

**Fig. S2** Perspective view of  $[\text{Yb}_2(\text{TFA})_6(\text{diglyme})_2]$  (**3**). H-atoms on diglyme ligand have been omitted for clarity. Selected bond lengths ( $\text{\AA}$ ) and angles ( $^\circ$ ):  $\text{Yb1—O4}^i$  2.307 (5),  $\text{Yb1—O25}$  2.430 (4),  $\text{Yb1}^i\text{—O11}^i$  2.258 (5),  $\text{Yb1—O28}$  2.226 (4),  $\text{Yb1—O19}$  2.430 (5),  $\text{O4}^i\text{—Yb1}^i\text{—O11}^i$  77.56 (17),  $\text{O2—Yb1—O22}$  144.44 (17),  $\text{O2—Yb1—O9}$  74.69 (18),  $\text{O9—Yb1—O22}$  79.63 (16),  $\text{O4}^i\text{—Yb1—O19}$  76.08 (17),  $\text{O2—Yb1—O25}$  82.68 (17),  $\text{O11}^i\text{—Yb1—O19}$  76.33 (17),  $\text{O9—Yb1—O25}$  71.95 (17),  $\text{O2—Yb1—O19}$  144.79 (17),  $\text{O2—Yb1—O28}$  78.06 (18),  $\text{O9—Yb1—O19}$  139.38 (17),  $\text{O9—Yb1—O28}$  138.48 (18). Symmetry code: (i)  $-x, -y+1, -z+2$ .

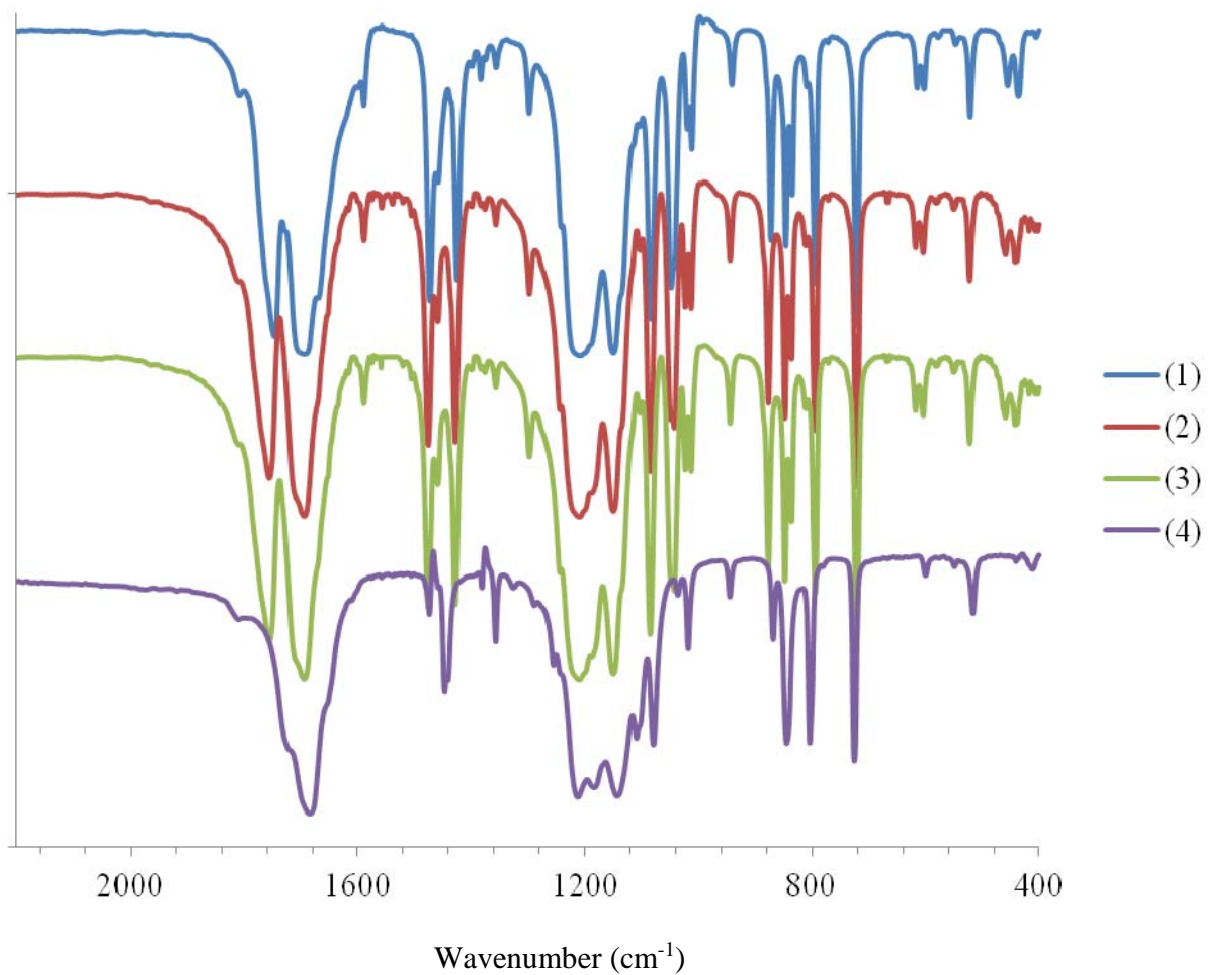

**Fig. S3** FT-IR spectra of (1)-(4) measured as nujol mulls.

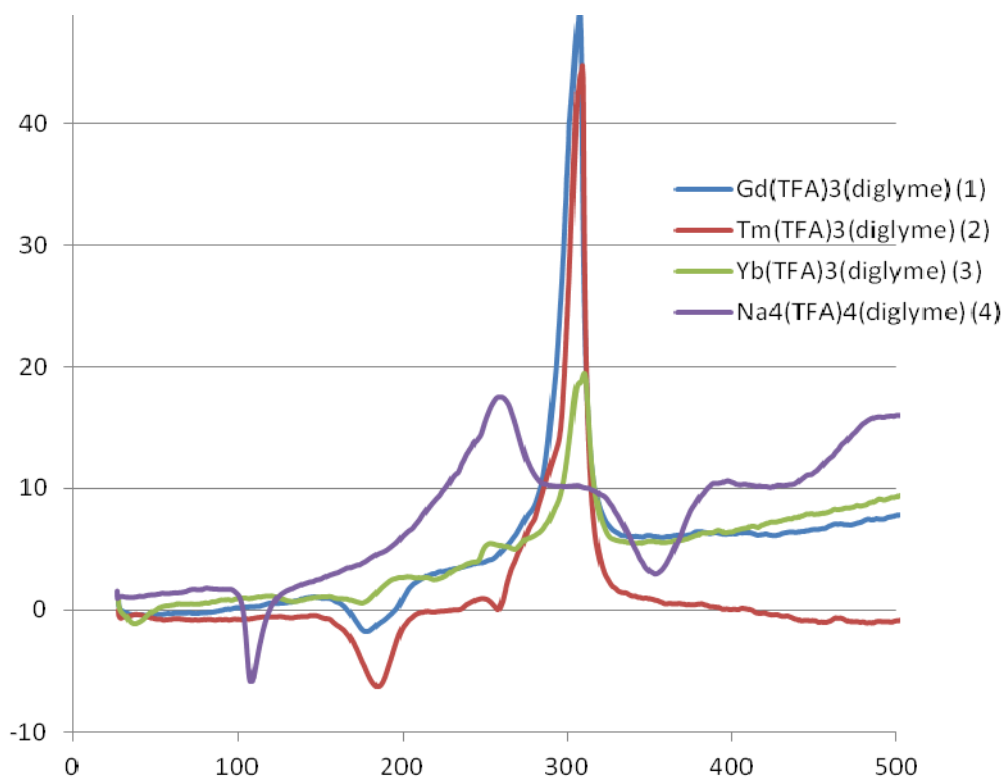

**Fig. S4** DTA curves of **1-4**.

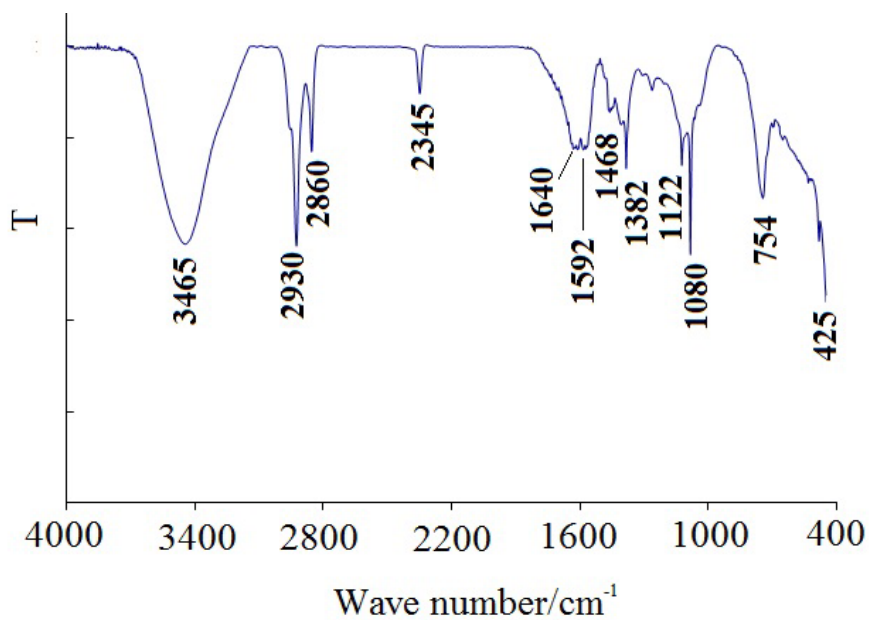

**Fig. S5** IR spectrum of as-prepared  $\text{GdF}_3:\text{Yb}^{3+}, \text{Tm}^{3+}$  NCs.

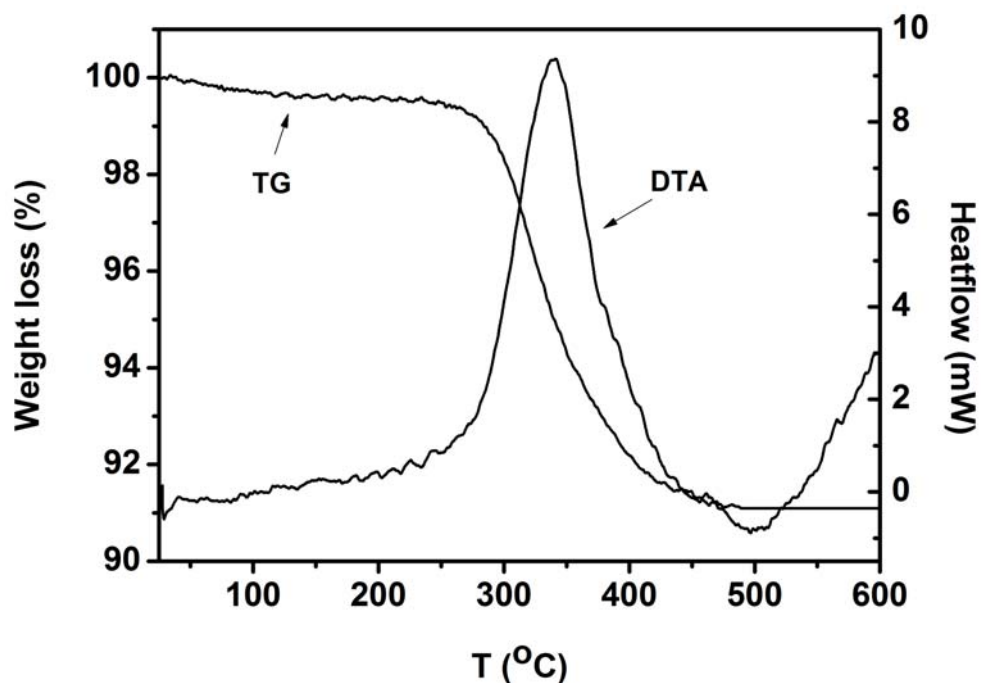

**Fig. S6** TG-DTA curves of as-prepared  $\text{GdF}_3:\text{Yb}^{3+}, \text{Tm}^{3+}$  NCs.

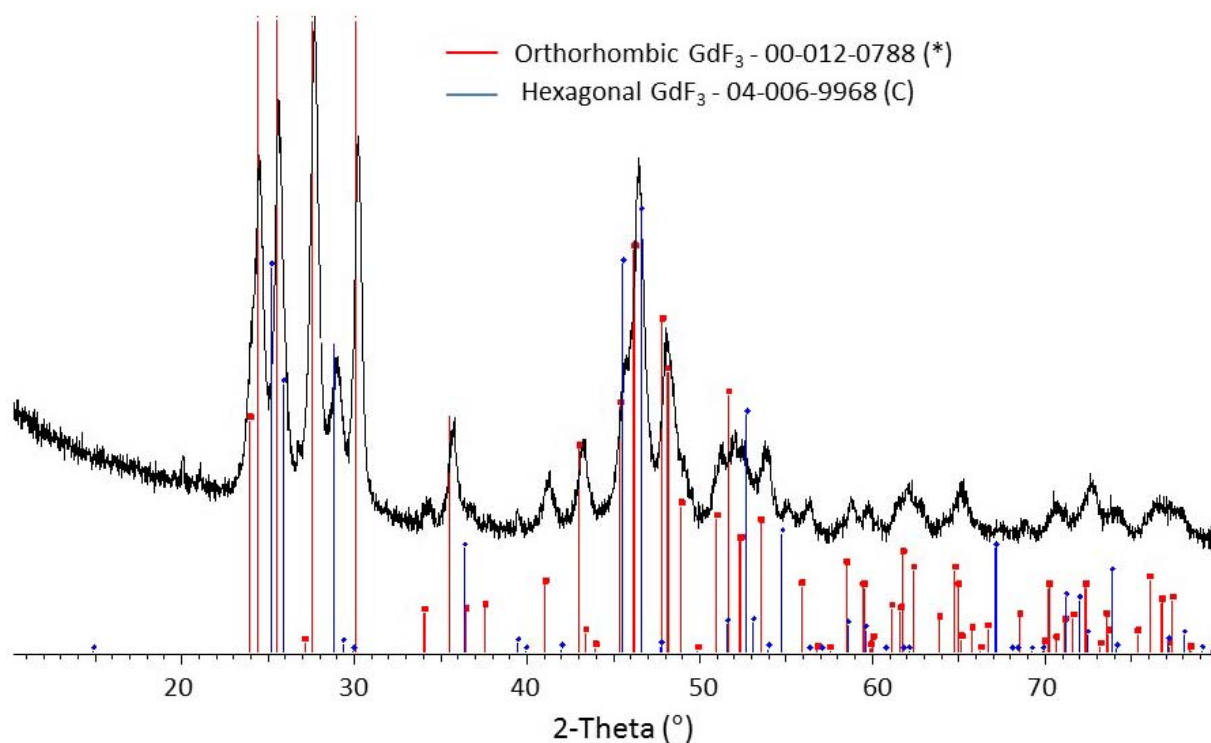

**Fig. S7** XRD of  $\text{GdF}_3: 20\% \text{Yb}^{3+}, 2\% \text{Tm}^{3+}, 20 \text{ mol}\% \text{Na}^+$  NCs.

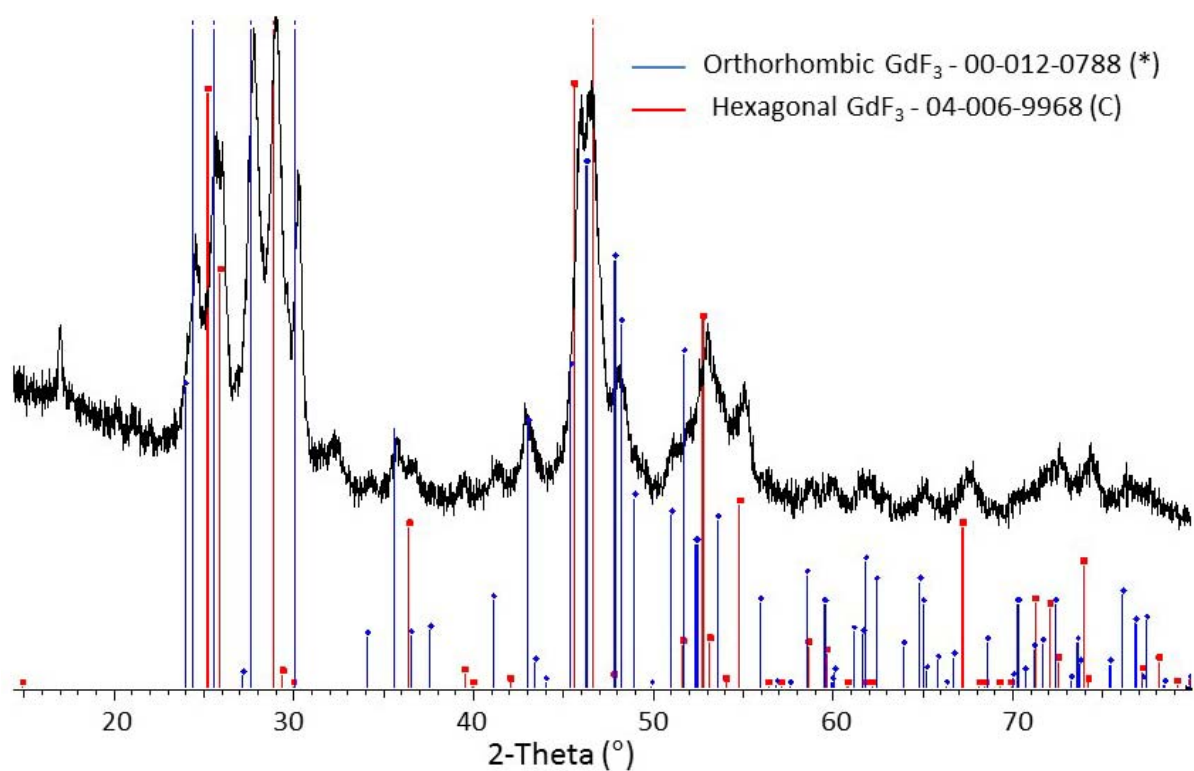

**Fig. S8** XRD of  $\text{GdF}_3$ : 20%  $\text{Yb}^{3+}$ , 2%  $\text{Tm}^{3+}$ , 30 mol%  $\text{Na}^+$  NCs.

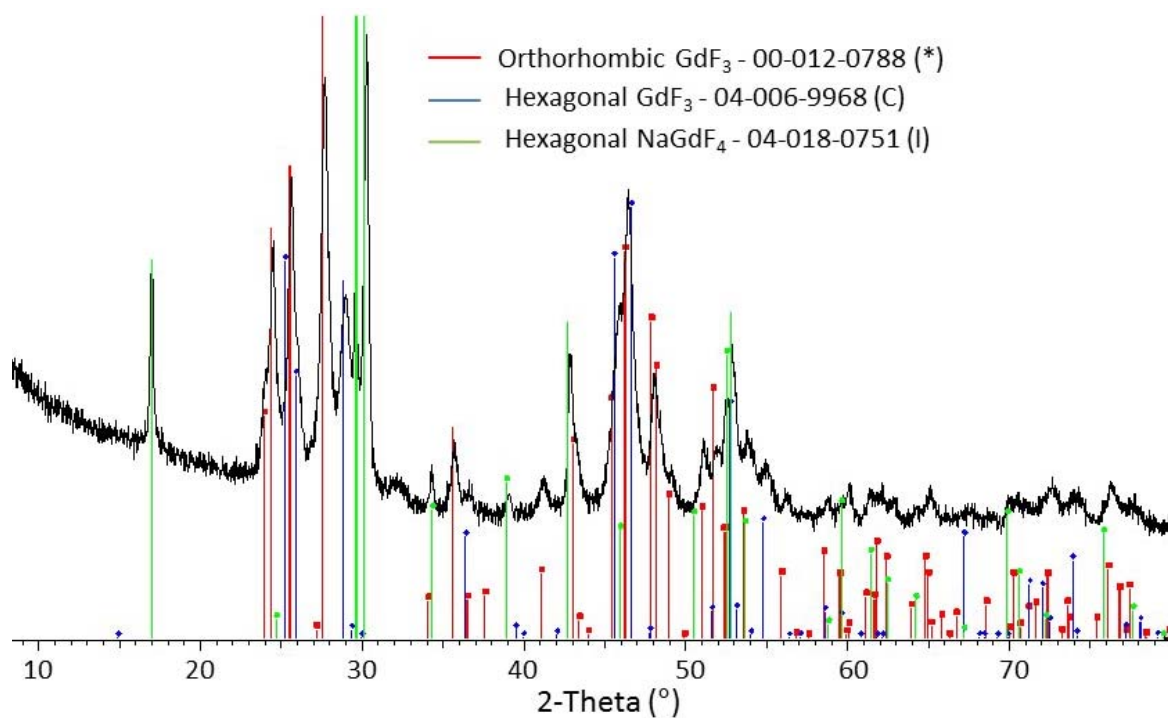

**Fig. S9** XRD of  $\text{GdF}_3$ : 20%  $\text{Yb}^{3+}$ , 2%  $\text{Tm}^{3+}$ , 40 mol%  $\text{Na}^+$  NCs.

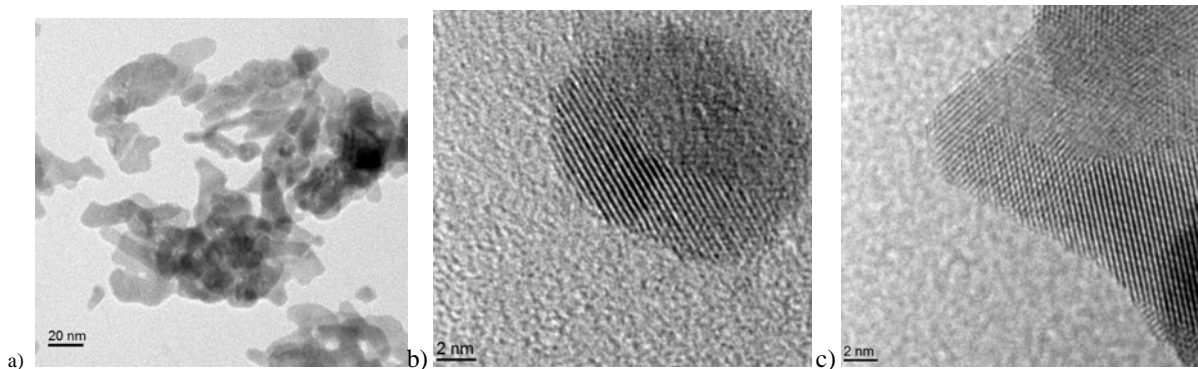

**Fig. S10** TEM and HR-TEM images of as-prepared  $\text{GdF}_3:\text{Yb}^{3+}, \text{Tm}^{3+}$  NCs.

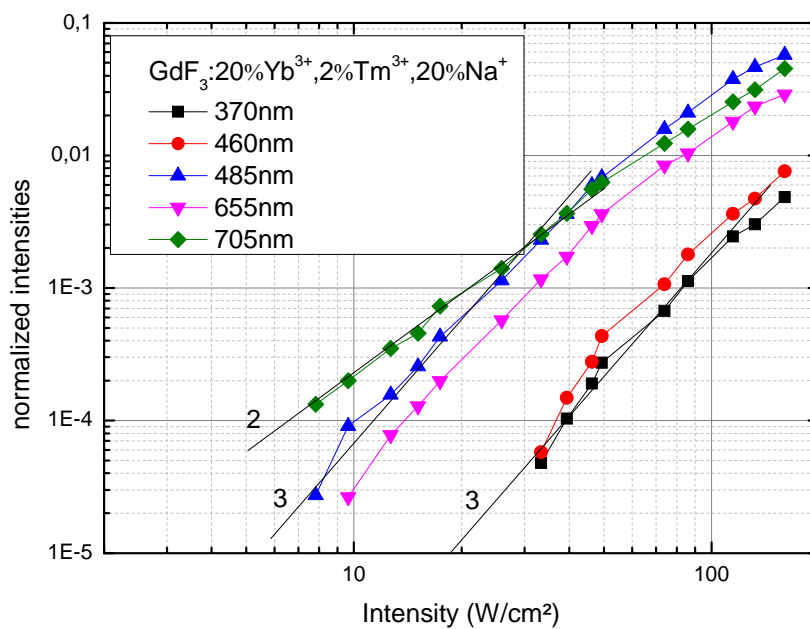

**Fig. S11** Evolution of the intensity of the different bands of  $\text{GdF}_3: 20\% \text{Yb}^{3+}, 2\% \text{Tm}^{3+}, 20\% \text{Na}^+$  NCs with the fluence.



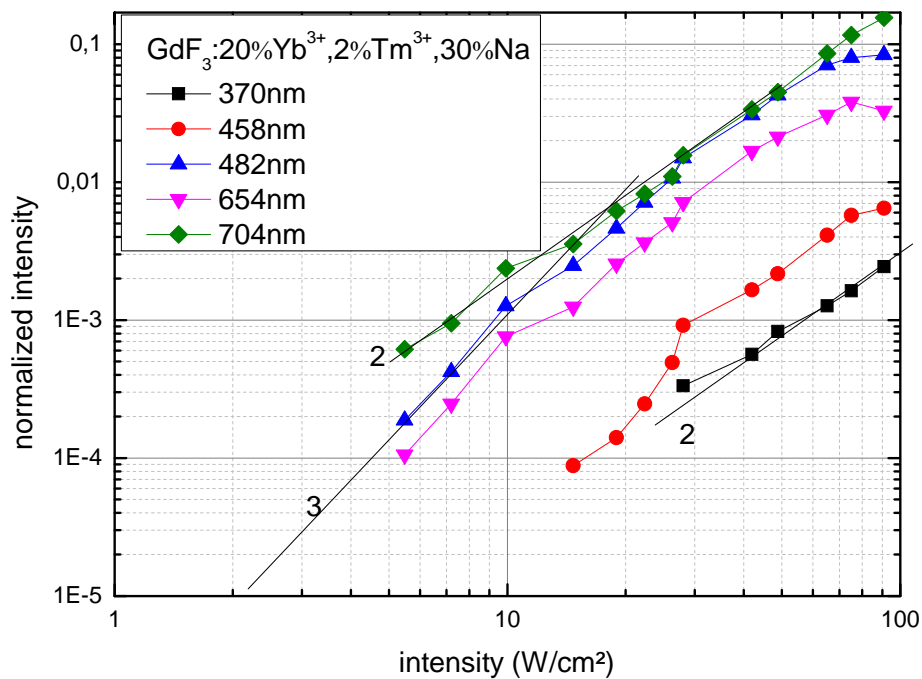

**Fig. S12** Evolution of the intensity of the different bands of  $\text{GdF}_3: 20\% \text{Yb}^{3+}, 2\% \text{Tm}^{3+}, 30\% \text{Na}^+$  NCs with the fluence.

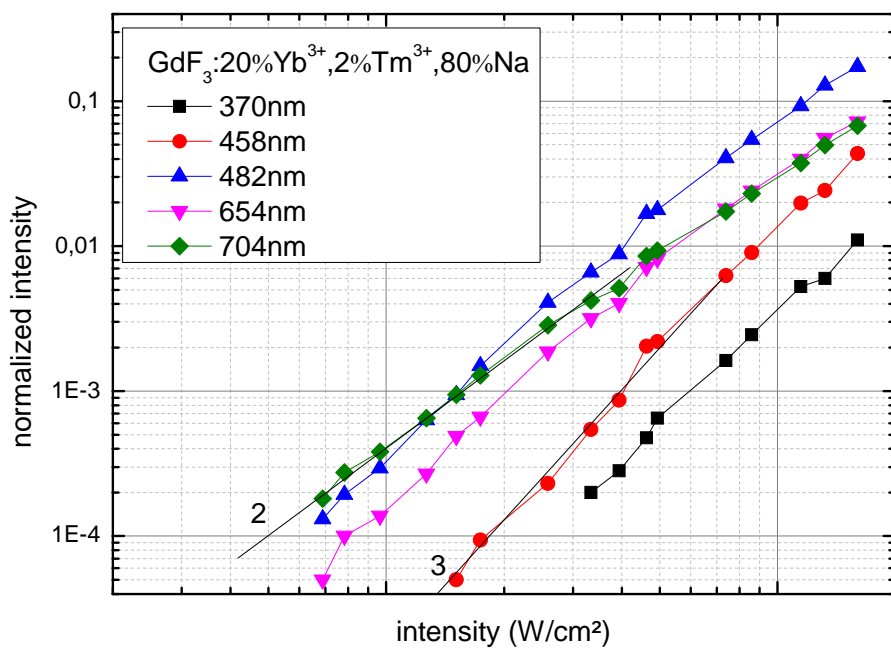

**Fig. S13** Evolution of the intensity of the different bands of  $\text{GdF}_3: 20\% \text{Yb}^{3+}, 2\% \text{Tm}^{3+}, 80\% \text{Na}^+$  NCs with the fluence.

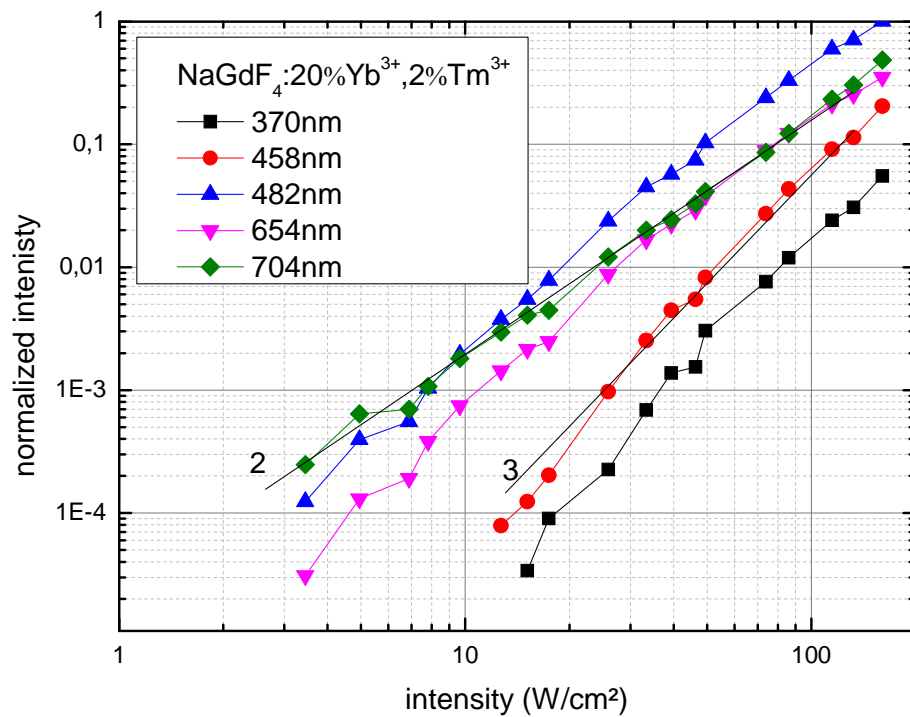

**Fig. S14** Evolution of the intensity of the different bands of NaGdF<sub>4</sub>: 20% Yb<sup>3+</sup>, 2% Tm<sup>3+</sup> NCs with the fluence.
